# Supplementary material for: Individual Curiosity Modulates Exploration in Sequential Book Selection
Source: Research Square preprint supplement (doi:10.21203/rs.3.rs-5442881/v1), 2024-12-05
Supplement: Supplementary file 1 [file 3f277dc6696d746070cc9ef2.pdf]

# Supplementary Information

## 1 Experimental Stimulus Selection

The experimental decision task presents a multi-armed bandit task with 225 book options arranged in a 15x15 grid. We selected these 225 books in the following way: (1) we created a subsample of books with an average rating higher than 4 and more than 20 ratings in the GoodReads metadata, (2) we further subsampled books to include books that have a synopsis longer than 600 characters and shorter than 1200 characters, (3) we randomly sampled 25 books for each genre in a genre list consisting 18 common book genres, (4) the final selections were made based on synopsis quality.

## 2 Experimental Stimulus Validation

We collected perceived pairwise similarities among 22 sampled books from 248 participants recruited from Prolific. We randomly drew 15 pairs of book synopses for each participant and asked participants to read the synopses and evaluate the similarities between the book pairs. For each pair of these 22 books, we averaged participants' perceived similarity responses (ranging from 1 to 9) and constructed a 22x22 distance matrix. In addition, we also constructed another two 22x22 distance matrices with distance metrics calculated as the Euclidean distance between semantic embedding vectors of the 22 books and the distance metrics calculated as the Euclidean distance between 22 books in the grid space. We compared the two distance matrices and evaluated the association between these two distance metrics using the Mantel test [1]. We conducted the Mantel test using 10,000 permutations on Pearson correlation metrics and conducted two-tailed significance tests. The results are shown in Supplemental Table 1 and Supplemental Figure 1.

**Table 1** Mantel test results to evaluate the association among different distance metrics.

| Pair of distance metrics                         | $r$   | $Z$   | Empirical $p$ -value |
|--------------------------------------------------|-------|-------|----------------------|
| Perceived distance - Semantic Embedding distance | 0.546 | 7.247 | <0.001               |
| Perceived distance - Grid distance               | 0.410 | 6.199 | <0.001               |
| Semantic Embedding - Grid distance               | 0.543 | 8.188 | <0.001               |

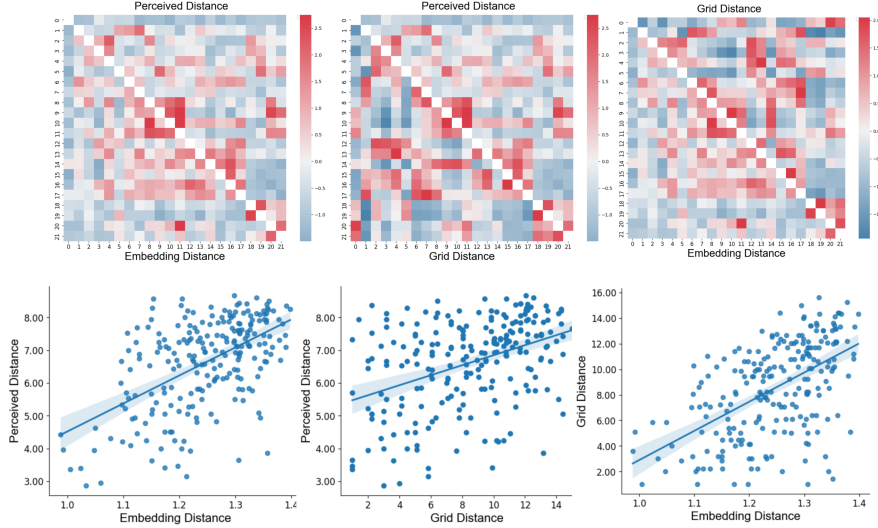

**Fig. 1** Upper Panel: Using different distance metrics, the heatplots of the pairwise distance between sampled 22 books. The upper matrix and lower matrix encode different distance metrics. Color encodes normalized distance metrics. Bottom Panel: The regression plots of pairwise associations among three distance metrics. Columns represent different pairs of distance metrics: Semantic Embedding Distance - Subject Perceived Distance (Left), Grid Space Distance - Subject Perceived Distance (Middle), and Semantic Embedding Distance - Grid Space Distance (Right).

### 24 3 Clustering tendency of books in semantic 25 embedding space

26 To measure to what extent books are clustered in the semantic embedding space, we  
27 calculated the Hopkins' Statistic as a measure of the clustering tendency of all books  
28 [2]. In principle, Hopkins' Statistic compares the distance between a book and its  
29 nearest neighbor to the distance between this book and a randomly selected book.  
30 The calculated Hopkins' Statistic  $H$  equals 0.755, indicating a clustering tendency at  
31 the 90% confidence level.

### 32 4 Learning to Choose Better Books or Enjoy Books 33 More Over Time?

34 We found that people choose more favorable books over time, as shown by the increas-  
35 ing trend of book ratings as the number of books read increases. However, alternative  
36 explanations exist such that people are not learning to choose better books but are  
37 just becoming more favorable toward books as a function of time. This phenomenon,  
38 known as coherency maximization [3], is common in purchase behavior such that the  
39 more people purchase a product, the more they will like it. To test this alternative  
40 explanation, we combined two independent datasets (people's selection histories and  
41 GoodReads rating data) and found that there is a positive association between the  
42 average rating of books (scrapped from GoodReads) and people's number of past

43 reads ( $r = 0.034, p < 0.001, 99\%CI = [0.032, 0.036]$ ), shown in Supplemental Figure  
44 2. Thus, we show that people are not just increasingly liking the selected book but  
45 are learning to select better books.

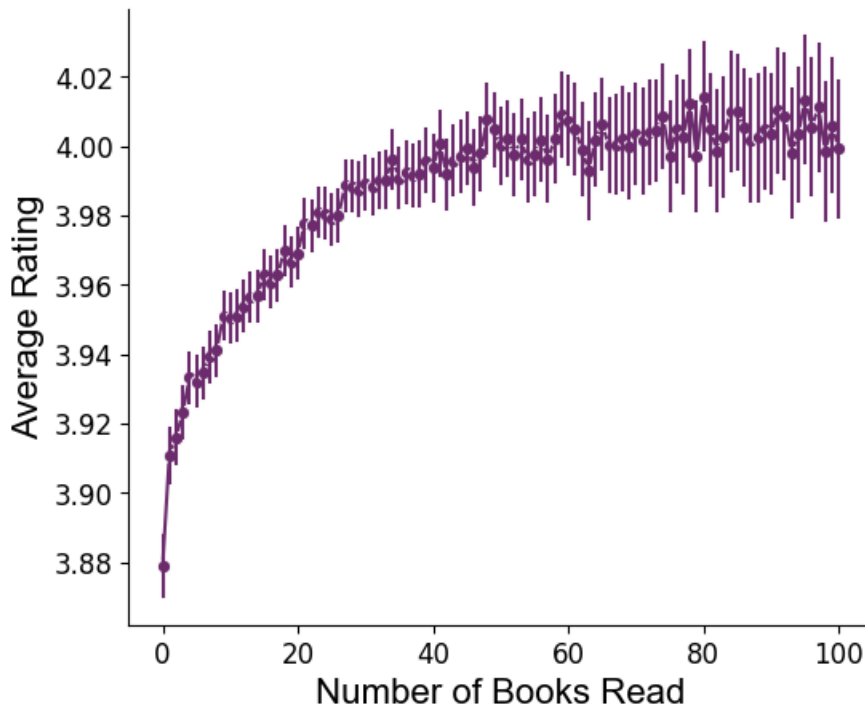

**Fig. 2** The lineplot of book average rating (scrapped from GoodReads metadata) by the number of books read in the past.

## 46 5 Sensitivity Analysis: Mixed Effect Model for 47 Exploration Distance and Reading Enjoyment

48 We conducted a sensitivity analysis using a mixed effect model for the exploration  
49 distance in the real-world dataset, with a random intercept for each subject in the  
50 dataset. Our main analysis found that people's explore distance is associated with  
51 (1) the number of past reads, (2) the preceding reading enjoyment, (3) the number  
52 of following book reviews, and (4) the variance of following book reviews. Thus in  
53 the mixed effect regression model, we specified fixed effect variables as these four  
54 variables. Moreover, considering a potential autocorrelation effect in the sequence of  
55 explore distances, we added the preceding explore distance as an additional fixed effect  
56 variable in our mixed regression model (Equation S1). Here, we report the model  
57 fitting regression coefficient estimates in Supplemental Table 2.

$$ExploreDistance_{t,j} \sim \beta_{0,j} + \beta_1 t + \beta_2 ExploreDistance_{t-1,j} + \beta_3 Enjoyment_{t-1,j} + \beta_4 VarianceRating_{t,j} + \beta_5 \log(RatingSize_{t,j}) + \epsilon_{t,j} \quad (1)$$

58 Similarly, we fit the mixed effect model for exploration distance in the experimental  
 59 dataset. Note that the number and the variance of book reviews were not shown to  
 60 the participants, we dropped these two variables in the model for experimental data,  
 61 while adding people’s curiosity measures to the model. Thus, we specified the mixed  
 62 effect model with a random intercept for each subject in the dataset and fixed effect  
 63 variables as the sequential order of the exploration, the preceding exploration distance,  
 64 preceding reading enjoyment, and the five dimensions of trait curiosity as independent  
 65 variables (Equation S2). We report the model fitting regression coefficient estimates  
 66 in Supplemental Table 3.

$$ExploreDistance_{t,j} \sim \beta_{0,j} + \beta_1 t + \beta_2 ExploreDistance_{t-1,j} + \beta_3 Enjoyment_{t-1,j} + \beta_4 CuriosityJE_j + \beta_5 CuriosityTS_j + \beta_6 CuriosityDS_j + \beta_7 CuriosityST_j + \beta_8 CuriositySC_j + \epsilon_{t,j} \quad (2)$$

**Table 2** Result of random intercept mixed effect model regression on explore distance in the real-world dataset.

|                               | Estimate | SE    | Z       | P > ( Z ) |
|-------------------------------|----------|-------|---------|-----------|
| Fixed Intercept               | 0.981    | 0.001 | 771.288 | < 0.001   |
| Sequential order              | 0.000    | 0.000 | 9.000   | < 0.001   |
| Preceding explore distance    | 0.163    | 0.001 | 216.567 | < 0.001   |
| Preceding reading enjoyment   | -0.005   | 0.000 | -37.621 | < 0.001   |
| Current rating variance       | 0.035    | 0.000 | 78.740  | < 0.001   |
| Current log number of ratings | -0.002   | 0.000 | -41.940 | < 0.001   |

67 Furthermore, our main analysis found people’s explore distance is associated with  
 68 their following reading enjoyment, and there exists an interaction effect between joy-  
 69 ous exploration and explore distance on people’s following reading enjoyment. Thus,  
 70 in this sensitivity analysis, we fitted a mixed-effect regression model on people’s read-  
 71 ing enjoyment with independent variables including (1) preceding explore distance,  
 72 (2) joyous exploration, and (3) an interaction effect between joyous exploration and  
 73 preceding explore distance. Similar to the mixed effect model for the explore distance  
 74 mentioned above, we specified an additional fixed effect variable as the sequential  
 75 order of the exploration and the preceding reading enjoyment to account for the poten-  
 76 tial trend effect and autocorrelation effect (Equation S3). We report the results in  
 77 Supplemental Tables 4.

**Table 3** Result of random intercept mixed effect model regression on explore distance in the experimental dataset.

|                             | Estimate | SE    | Z       | P > ( Z ) |
|-----------------------------|----------|-------|---------|-----------|
| Fixed Intercept             | 8.156    | 0.740 | 11.024  | < 0.001   |
| Sequential order            | -0.118   | 0.020 | -6.015  | < 0.001   |
| Preceding explore distance  | 0.278    | 0.016 | 17.328  | < 0.001   |
| Preceding reading enjoyment | -0.577   | 0.034 | -16.925 | < 0.001   |
| Joyous Exploration          | 0.287    | 0.121 | 2.365   | 0.019     |
| Thrill Seeking              | 0.158    | 0.108 | 1.469   | 0.143     |
| Deprivation sensitivity     | -0.102   | 0.103 | -0.992  | 0.322     |
| Stress tolerance            | -0.141   | 0.092 | -1.533  | 0.127     |
| Social Curiosity            | -0.120   | 0.084 | -1.422  | 0.157     |

$$\begin{aligned}
 \text{Enjoyment}_{t,j} \sim & \beta_{0,j} + \beta_1 t + \beta_2 \text{Enjoyment}_{t-1,j} + \beta_3 \text{ExploreDistance}_{t-1,j} \\
 & + \beta_4 \text{CuriosityJE}_j + \beta_5 \text{ExploreDistance}_{t-1,j} * \text{CuriosityJE}_j \\
 & + \epsilon_{t,j} \quad (3)
 \end{aligned}$$

**Table 4** Result of random intercept mixed effect model regression on reading enjoyment in the experimental dataset.

|                                                 | Estimate | SE    | Z      | P > ( Z ) |
|-------------------------------------------------|----------|-------|--------|-----------|
| Fixed Intercept                                 | 3.721    | 0.437 | 8.512  | < 0.001   |
| Sequential order                                | 0.042    | 0.009 | 4.824  | < 0.001   |
| Preceding enjoyment                             | 0.075    | 0.019 | 3.935  | < 0.001   |
| Preceding explore distance                      | -0.100   | 0.037 | -2.687 | 0.007     |
| Joyous Exploration                              | 0.183    | 0.084 | 2.191  | 0.028     |
| Preceding explore distance * Joyous Exploration | 0.016    | 0.007 | 2.142  | 0.032     |

## 6 Computational Modeling

Following previous studies[4, 5], we constructed two computational models: a Gaussian Process (*GP*) regression model for the reward generalization mechanism and an Upper Confidence Bound (*UCB*) model for the directed exploration mechanism.

### 6.1 Gaussian process regression

In principle, *GP*[6] formalizes a value function  $f$  that takes the options' semantic features  $x$  in a multi-dimensional space (semantic embeddings in real-world data and grid embedding in experiment data) as inputs and outputs a scalar value as the expected reward. This function is modeled as a multivariate Gaussian:

$$f \sim GP(m(x), k(x, x')) \quad (4)$$

87

$$m(x) = E[f(x)] \quad (5)$$

88

$$k(x, x') = E[(f(x) - m(x))(f(x') - m(x')))] \quad (6)$$

89

where  $m(x)$  denotes the expected value for the value function of option  $x$ , and  $k(x, x')$  encodes the value covariance between two options  $x$  and  $x'$ .

91

Consider a sequence of observations of book selections  $\mathbf{X} = [x_1, x_2, \dots, x_t]$  and their corresponding rewards  $\mathbf{y} = [y_1, y_2, \dots, y_t]$  from time 1 to time  $t$ . *GP* regression uses the Bayesian principle to generate the posterior predictions of a target option  $x^*$ , by computing its posterior mean  $m(x^*)$  and variance  $v(x^*)$  conditional on observations  $\mathbf{X}, \mathbf{y}$ :

96

$$m(x^*|\mathbf{X}, \mathbf{y}) = \mathbf{k}_*^T (\mathbf{K} + \sigma^2 \mathbf{I})^{-1} \mathbf{y} \quad (7)$$

$$v(x^*|\mathbf{X}, \mathbf{y}) = \mathbf{k}_*^T (\mathbf{K} + \sigma^2 \mathbf{I})^{-1} \mathbf{k}_* \quad (8)$$

97

where  $\mathbf{k}_*$  denotes the  $1 * t$  covariance matrix between input observations  $\mathbf{X}$  and the target option  $x^*$ ,  $\mathbf{K}$  denotes the  $t * t$  covariance matrix of the input observations  $\mathbf{X}$ , and  $\sigma^2$  denotes the assumed noise from the observations. Here, we specify  $\sigma^2 = 1$ .

100

The covariance between two options is defined by a Radical Kernel function so that the posterior estimation depends on the Euclidean distance between target options and the input observations:

102

$$k(x, x') = \exp\left(-\frac{\|x - x'\|^2}{2\lambda^2}\right) \quad (9)$$

103

In this way, the *GP* regression and the kernel function together formalize the reward generalization mechanism by assuming that similar options will generate similar reward outcomes. The length-scale parameter  $\lambda$  in the kernel function regulates this generalization process by controlling the smoothness of the generalization function, in a way such that  $\lambda \rightarrow 0$  leads to zero generalization and independent value estimation among options, whereas  $\lambda \rightarrow \infty$  leads to maximum generalization, such that the dependency of value estimation is linear to feature distances.

110

## 6.2 Value Function and Decision Function

111

The *GP* regression model simply considers that the value for a target option  $Q_{GP}(x^*)$  equals its expected reward  $m(x^*)$  as:

112

$$Q_{GP}(x^*) = m(x^*) \quad (10)$$

113

Conversely, the UCB model specifies the value for a target option  $Q_{UCB}(x^*)$  as a weighted sum of the expected reward  $m(x^*)$  and the square root of the variance of the reward estimation  $v(x^*)$ :

115

$$Q_{UCB}(x^*) = m(x^*) + \beta \sqrt{v(x^*)} \quad (11)$$

116

where the exploration bonus parameter  $\beta$  controls the extent of directed exploration, with higher  $\beta$  leading to a stronger bias towards options with high uncertainty.

117

118 Next, we specify the decision function for both models as a softmax function, which  
119 maps the estimated value for  $N$  available options to the probabilities of choosing an  
120 option  $x_i$  as  $p(x_i)$ :

$$p(x_i) = \frac{\exp(Q(x_i)/\tau)}{\sum_j^N \exp(Q(x_j)/\tau)} \quad (12)$$

121 where the random temperature parameter  $\tau$  in this softmax controls the randomness  
122 in the probabilistic mechanism.  $\tau \rightarrow 0$  leads to zero randomness, such that the highest-  
123 valued option is always chosen, whereas  $\tau \rightarrow \infty$  leads to maximum randomness with  
124 a uniform probability of selecting any option.

## 125 7 A Challenge for Comparing Computational 126 Models with Real-world Data

127 We recognize model performance comparisons depend on the relative exploration or  
128 exploitation tendencies between observed choices and alternatives. Consider, an empir-  
129 ical choice was observed and used to estimate the performance of models with or  
130 without directed exploration. If all the alternative options were high in estimated  
131 uncertainty, the observed empirical choice would become relatively more exploitative,  
132 thus favoring a model without directed exploration. Similarly, an exploitive option  
133 space for the available alternatives will bias the model comparison, favoring the model  
134 with a directed exploration mechanism.

135 As a result, information on the option space is vital for an unbiased comparison  
136 between exploration and exploitation models. However, we do not know such informa-  
137 tion for real-world data. Consistent with prior research [7], we specified an artificial  
138 alternative option with averaged features of all available options, but this fixed, arbi-  
139 trary, and small option space inevitably introduces opaque biases in our comparison  
140 results for real-world data. We note that our results from experiment data are not  
141 subject to this issue because the alternative option space is always known. Thus, our  
142 parallel analysis of real-world and experimental data helps us overcome this challenge.

## 143 8 Multiple Regression on Exploration Parameters

144 We applied multiple regression models on the exploration parameters (i.e.,  $\tau$ ,  $\beta$ )  
145 with curiosity dimensions as independent variables while controlling for participants'  
146 age, as specified in Equation S13. The result of the regression model is reported in  
147 Supplementary Table 5.

$$\tau, \beta \sim \beta_0 + \beta_1 Age + \beta_2 CuriosityJE + \beta_3 CuriosityTS + \beta_4 CuriosityDS + \beta_5 CuriosityST + \beta_6 CuriositySCj + \epsilon \quad (13)$$

148 In addition, we plotted the bi-variate pairwise correlation matrix among the  
149 dependent variables and independent variables in our specified regression model in  
150 Supplemental Figure 3.

**Table 5** Result of multiple regression on decision parameters.

|                                                         | Bonus $\beta$ |              |              |              | Temperature $\tau$ |              |               |              |
|---------------------------------------------------------|---------------|--------------|--------------|--------------|--------------------|--------------|---------------|--------------|
|                                                         | Estimate      | SE           | $t(238)$     | $P > ( t )$  | Estimate           | SE           | $t(238)$      | $P > ( t )$  |
| Intercept                                               | -1.405        | 1.340        | -1.049       | 0.295        | -0.9227            | 0.634        | -1.456        | 0.147        |
| Age                                                     | -0.007        | 0.016        | -0.442       | 0.659        | 0.0027             | 0.007        | 0.359         | 0.720        |
| <b>Joyous-<br/>Exploration-<br/>Thrill-<br/>Seeking</b> | <b>0.605</b>  | <b>0.214</b> | <b>2.824</b> | <b>0.005</b> | <b>-0.2011</b>     | <b>0.101</b> | <b>-1.983</b> | <b>0.049</b> |
| Deprivation-<br>Sensitivity                             | -0.150        | 0.195        | -0.771       | 0.441        | <b>0.2247</b>      | <b>0.092</b> | <b>2.440</b>  | <b>0.015</b> |
| Stress-<br>Tolerance                                    | -0.150        | 0.183        | -0.816       | 0.416        | -0.1213            | 0.087        | -1.399        | 0.163        |
| Social-<br>Curiosity                                    | 0.039         | 0.169        | 0.228        | 0.820        | -0.0237            | 0.080        | -0.296        | 0.768        |
|                                                         | 0.021         | 0.149        | 0.137        | 0.891        | 0.0647             | 0.071        | 0.915         | 0.361        |

Note: Statistics of significant hypothesis testing results were bolded in the table.

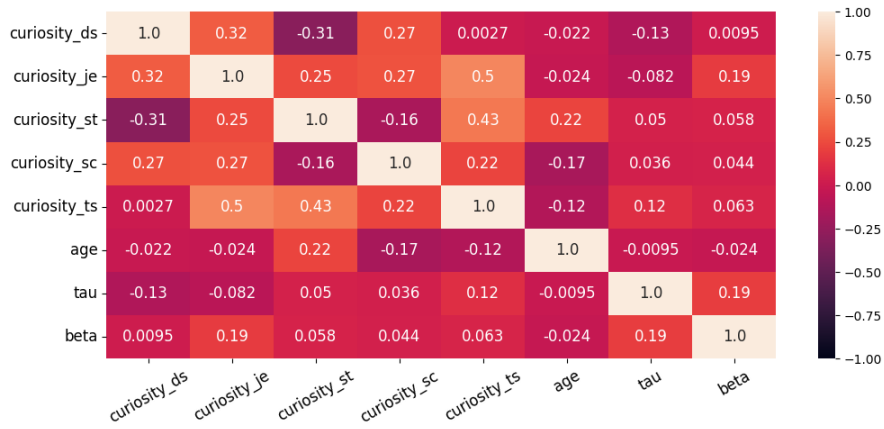

**Fig. 3** The bivariate Pearson correlation matrix of individual-level variables.

## 151 9 Sensitivity Analysis on Multiple Regression

152 We conducted a sensitivity analysis for the multiple regression on the exploration  
 153 parameters after the removal of the non-significant variables. The results are reported  
 154 in Supplemental Table 6 for exploration bonus  $\beta$  and Supplemental Table 7 for random  
 155 temperature  $\tau$ .

## 156 10 Sensitivity Analysis with Censored Regression

157 We recognized that a considerable portion of the parameter estimation for the explo-  
 158 ration bonus  $\beta$  reaches the boundary close to 0. This issue might hamper the regression  
 159 coefficient estimation due to a non-normal error distribution. Thus, we fit a censored  
 160 regression on exploration bonus  $\beta$ , which assumes the dependent variable is censored

**Table 6** Result of regression model on log exploration bonus  $\beta$  after removal of non-significant variables.

|                    | Estimate | <i>SE</i> | <i>t</i> (243) | <i>P</i> > (  <i>t</i>  ) |
|--------------------|----------|-----------|----------------|---------------------------|
| Intercept          | -2.039   | 0.841     | -2.423         | 0.016                     |
| Joyous Exploration | 0.491    | 0.167     | 2.945          | 0.004                     |

**Table 7** Result of multiple regression on log random temperature  $\tau$  after removal of non-significant variables.

|                    | Estimate | <i>SE</i> | <i>t</i> (242) | <i>P</i> > (  <i>t</i>  ) |
|--------------------|----------|-----------|----------------|---------------------------|
| Intercept          | -1.0588  | 0.402     | -2.631         | 0.009                     |
| Joyous Exploration | -0.2385  | 0.091     | -2.613         | 0.010                     |
| Thrill Seeking     | 0.2418   | 0.081     | 2.974          | 0.003                     |

161 at boundaries near 0. The result remains consistent with the multiple regression results  
 162 and reported in Supplemental Table 8.

**Table 8** Result of censored regression on log exploration bonus  $\beta$ .

|                           | Estimate     | <i>SE</i>    | <i>t</i> (237) | <i>P</i> > (  <i>t</i>  ) |
|---------------------------|--------------|--------------|----------------|---------------------------|
| Intercept                 | -1.957       | 1.473        | -1.329         | 0.184                     |
| Age                       | -0.006       | 0.017        | -0.354         | 0.724                     |
| <b>Joyous Exploration</b> | <b>0.692</b> | <b>0.235</b> | <b>2.944</b>   | <b>0.003</b>              |
| Thrill Seeking            | -0.158       | 0.213        | -0.743         | 0.458                     |
| Deprivation Sensitivity   | -0.169       | 0.201        | -0.839         | 0.402                     |
| Stress Tolerance          | 0.027        | 0.186        | 0.144          | 0.885                     |
| Social Curiosity          | 0.045        | 0.163        | 0.279          | 0.781                     |

Note: Statistics of significant hypothesis testing results were bolded in the table.

## 163 11 Parameter Estimation Stability

164 We estimated the parameters using a global optimization method—the differential evo-  
 165 lution algorithm. This global optimization method is non-deterministic, so we repeated  
 166 the parameter estimation 100 times and took the average as our final parameter esti-  
 167 mate. Supplemental Figure 4 plots the within-subject variance of these 100 repetitions  
 168 of parameter estimations and shows that there is very small within-subject variability  
 169 for both parameter estimates, thus indicating that our parameter estimation method  
 170 is stable.

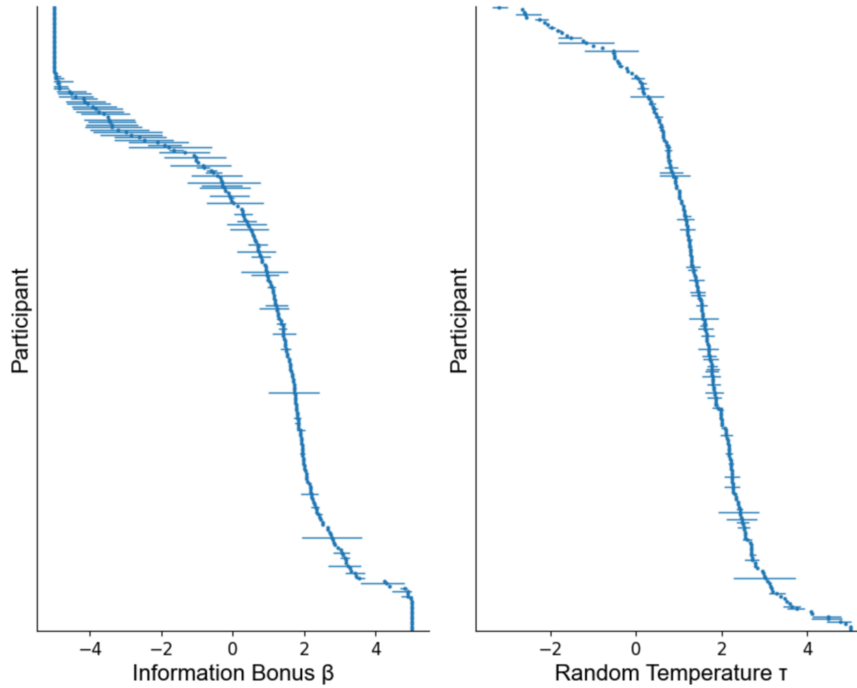

**Fig. 4** Parameter estimations across different optimization repetition and different participants. The y-axis encodes the participants ordered by a mean estimate of the parameter in descending order, while the x-axis encodes the exploration parameter for exploration bonus  $\beta$  (left) and random temperature  $\tau$  (right). The horizontal line encodes the 99% confidence interval of 100 repetitions of parameter estimations.

## 171 12 Cronbach's $\alpha$ for Curiosity Dimensions

172 To estimate the validity of the five-dimension curiosity scale, we measured Cronbach's  
 173  $\alpha$  statistic for each of the five dimensions including deprivation sensitivity, joyous  
 174 exploration, stress tolerance, social curiosity, and thrill-seeking. The results are shown  
 175 in Table 9 below. All dimensions of curiosity have a Cronbach's  $\alpha$  larger than 0.75,  
 176 indicating good reliability of the scale.

**Table 9** Cronbach's  $\alpha$  for the five curiosity dimensions

|                         | Cronbach's $\alpha$ | 95% Confidence Interval |
|-------------------------|---------------------|-------------------------|
| Deprivation Sensitivity | 0.822               | [0.788, 0.853]          |
| Joyous Exploration      | 0.788               | [0.742, 0.827]          |
| Stress Tolerance        | 0.854               | [0.823, 0.881]          |
| Social Curiosity        | 0.833               | [0.797, 0.864]          |
| Thrill Seeking          | 0.791               | [0.747, 0.830]          |

177 **References**

- 178 [1] Mantel, N. The detection of disease clustering and a generalized regression  
179 approach. *Cancer Research* **27**, 209–220 (1967).
- 180 [2] Lawson, R. G. & Jurs, P. C. New index for clustering tendency and its application  
181 to chemical problems. *Journal of Chemical Information and Computer Sciences*  
182 **30**, 36–41 (1990).
- 183 [3] Riefer, P. S., Prior, R., Blair, N., Pavey, G. & Love, B. C. Coherency-maximizing  
184 exploration in the supermarket. *Nature Human Behaviour* **1**, 1–4 (2017). URL  
185 <https://www.nature.com/articles/s41562-016-0017>.
- 186 [4] Schulz, E. *et al.* Structured, uncertainty-driven exploration in real-world consumer  
187 choice. *Proceedings of the National Academy of Sciences* **116**, 13903–13908 (2019).
- 188 [5] Wu, C. M., Schulz, E., Speekenbrink, M., Nelson, J. D. & Meder, B. Generalization  
189 guides human exploration in vast decision spaces. *Nature Human Behaviour* **2**,  
190 915–924 (2018).
- 191 [6] Rasmussen, C. E. & Williams, C. K. I. *Gaussian Processes for Machine Learn-*  
192 *ing* (The MIT Press, 2005). URL [https://direct.mit.edu/books/book/2320/  
193 Gaussian-Processes-for-Machine-Learning](https://direct.mit.edu/books/book/2320/Gaussian-Processes-for-Machine-Learning).
- 194 [7] Schulz, E. *et al.* Structured, uncertainty-driven exploration in real-world consumer  
195 choice. *Proceedings of the National Academy of Sciences* **116**, 13903–13908 (2019).  
196 URL <https://www.pnas.org/content/116/28/13903>.
